# Supplementary material for: Changing drivers of regional large magnitude avalanche frequency throughout Colorado, USA
Source: Copernicus journal article supplement (doi:10.5194/egusphere-2025-2217), 2025-06-24
Supplement: Supplementary file 1 [file egusphere-2025-2217-supplement.pdf]

# **Supplement for Changing drivers of regional large magnitude avalanche frequency throughout Colorado, USA**

Erich H. Peitzsch<sup>1\*</sup>, Justin T. Martin<sup>1</sup>, Ethan M. Greene<sup>2</sup>, Nicolas Eckert<sup>3</sup>, Adrien Favillier<sup>4</sup>, Jason Konigsberg<sup>2</sup>, Nickolas Kichas<sup>1</sup>, Daniel K. Stahle<sup>1</sup>, Karl W. Birkeland<sup>5</sup>, Kelly Elder<sup>6</sup>, Gregory T. Pederson<sup>1</sup>

<sup>1</sup> U.S. Geological Survey, Northern Rocky Mountain Science Center, West Glacier, Montana, United States

<sup>2</sup> Colorado Avalanche Information Center, Leadville, Colorado, United States

<sup>3</sup> Univ. Grenoble Alpes, INRAE, CNRS, IRD, Grenoble INP, IGE, Grenoble, France

<sup>4</sup> Dendrolab.ch, Department of Earth Sciences, University of Geneva, Geneva, Switzerland

<sup>5</sup> Birkeland Snow and Avalanche Scientific, Bozeman, Montana, United States

<sup>6</sup> U.S.D.A. Forest Service Rocky Mountain Research Station, Fort Collins, Colorado, United States

*Correspondence to:* Erich H. Peitzsch (epeitzsch@usgs.gov)

## Figures

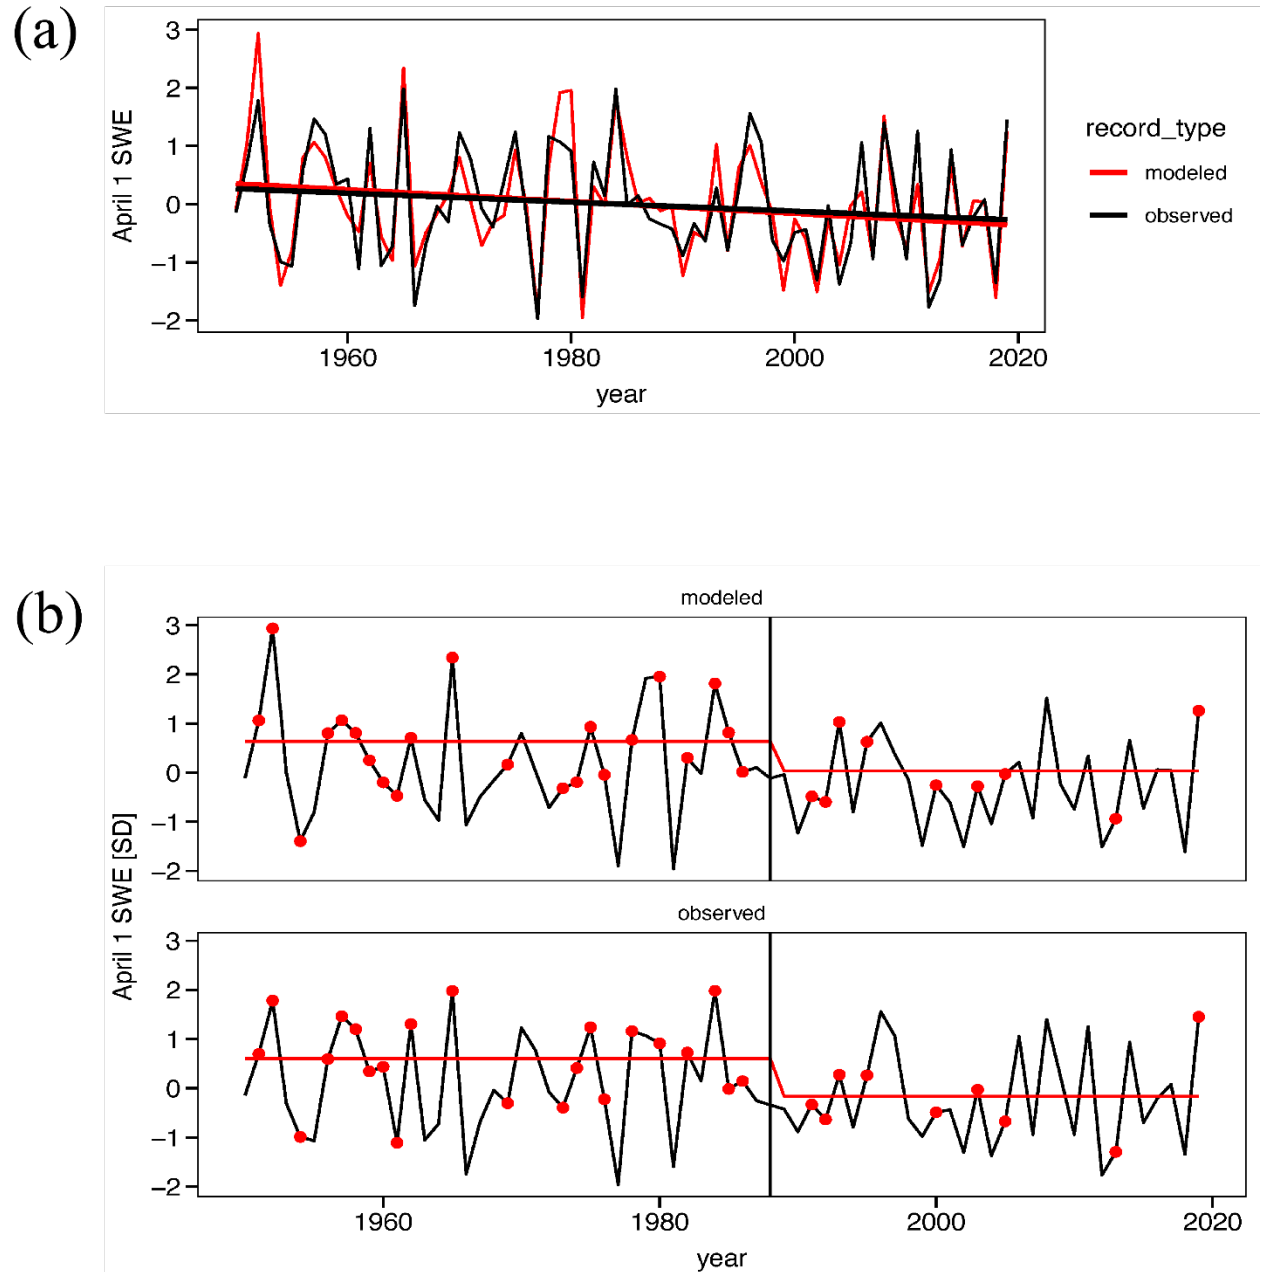

**Figure S1: Modelled and observed regional snowpack.** Panel (a) shows modelled April 1 SWE and April 1 SWE from regional snowcourse estimates for the period that the two records overlap (1950-2019), with simple linear regression derived trends included. Panel (b) shows the two records with avalanche years (red dots) and their mid- and late-period means (orange lines). We utilized the NCLimGrid 1/24th degree gridded monthly temperature and precipitation data (Vose et al., 2014) and coupled those data with gridded monthly water balance model estimates of monthly snowfall and total snowpack snow water equivalent (SWE) based on NCLimGrid inputs (Wieczorek et al., 2022) for water-years (October-September) 1901 to 2020. To assess the skill of the monthly water balance model at estimating snowfall over the study area, we compared the gridded snow product with local snow course records from the United States Department of Agriculture Natural Resources Conservation Service (NRCS) (Nrcs, 2024). We linked each avalanche path to its 1/24th degree grid cell and aggregated path-level April 1 modeled SWE estimates across the full study area to provide a regional modeled estimate of April 1 SWE from 1901-2020.

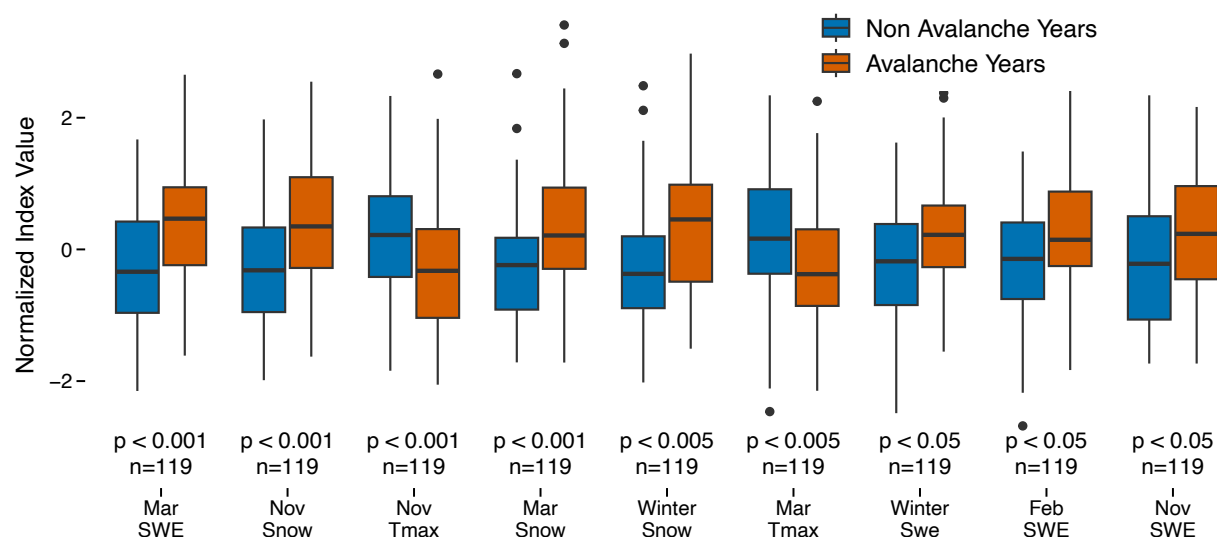

**Figure S2: Box plot comparisons of monthly snowfall total, accumulated snowpack (SWE), and temperature means across avalanche years vs. non-avalanche years within the full study period 1901-2019. Only those climate variables with monthly means that differed significantly between avalanche and non-avalanche years are shown with significant differences ( $\alpha=0.05$ ) assessed by the Wilcoxon's rank sum test. The box represents the interquartile range (IQR), 25<sup>th</sup> -75<sup>th</sup> percentile), the whiskers represent the range of values within 1.5 times the IQR, and the dots represent outliers >1.5 times and <3 times either end of the box.**

a)

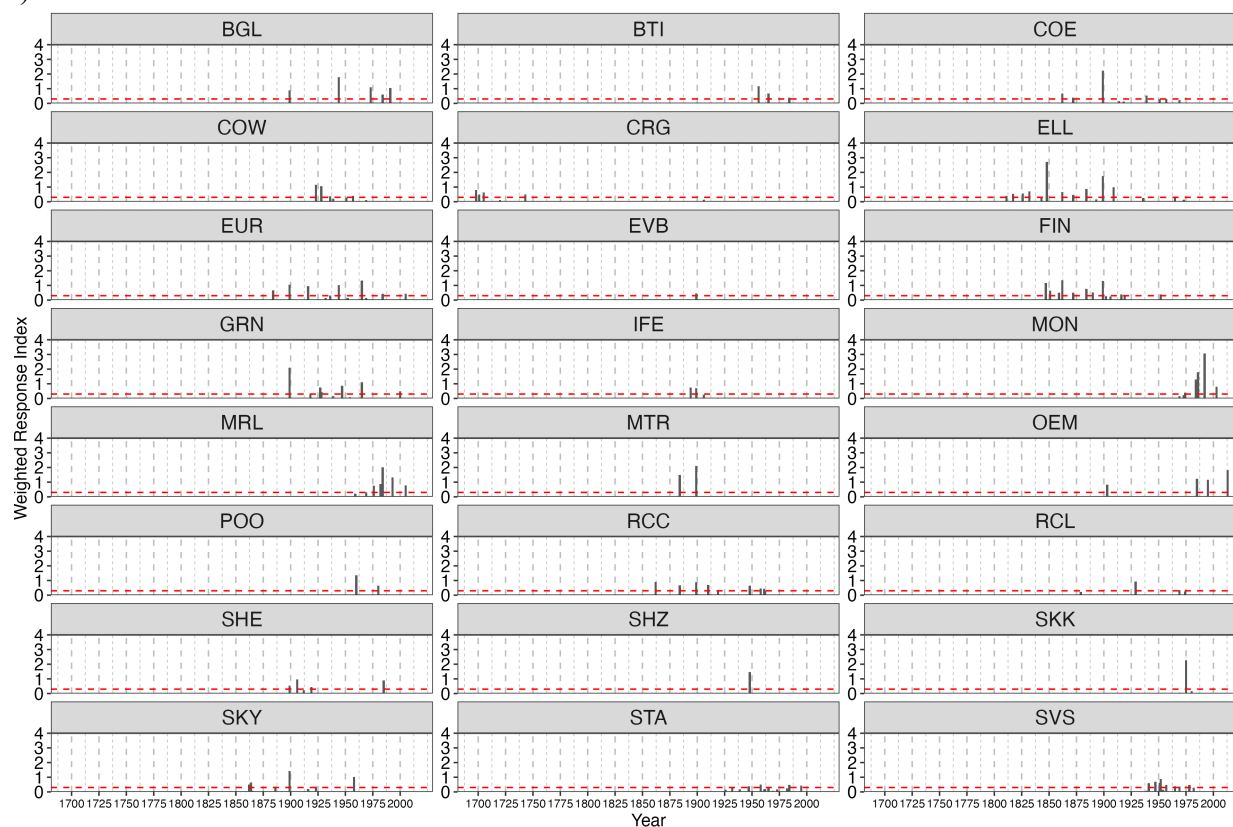

b)

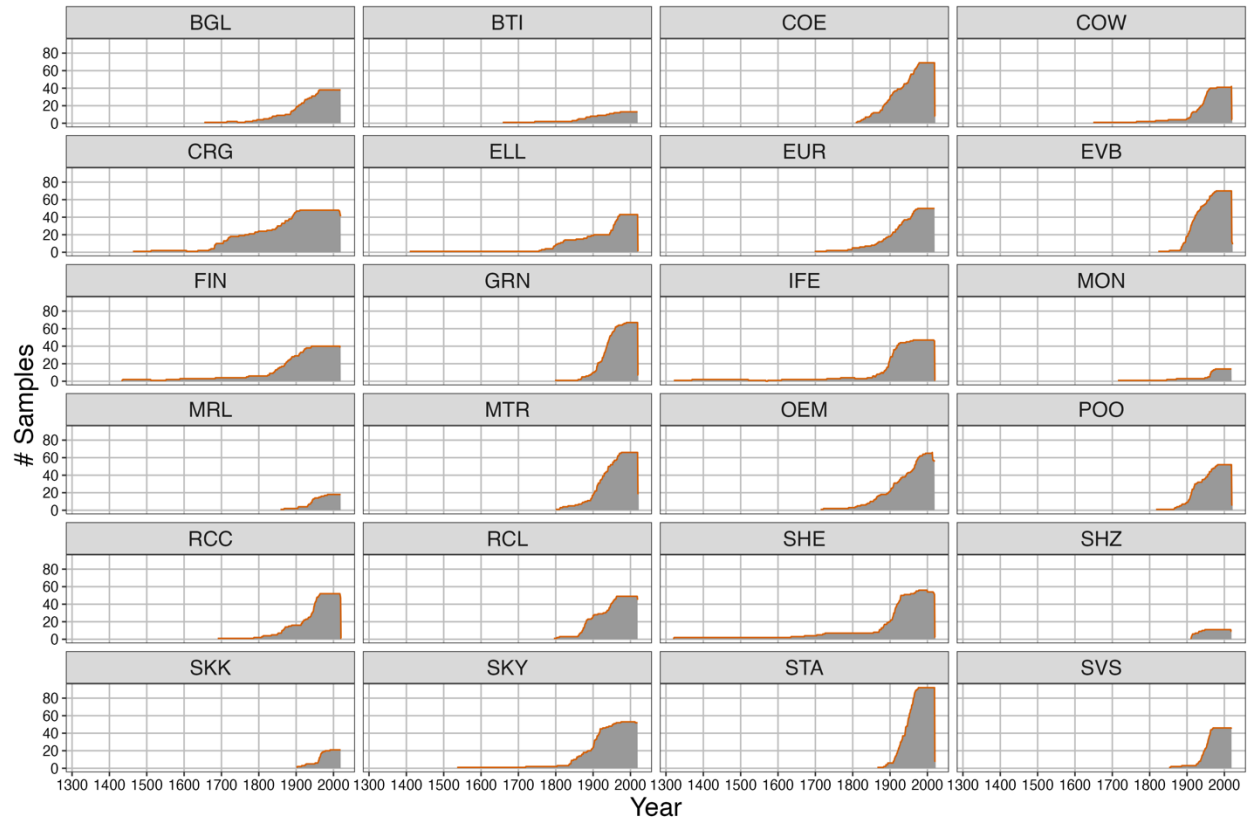

**Figure S3: a) Each panel represents the reconstructed avalanche years within an individual avalanche path. All bars above the red dashed line indicate a medium and high level of confidence ( $> 0.02 W_{it}$  value) and, thus, an “avalanche year”.  $W_{it}$  is a weighted index based on growth response quality (Favillier et al., 2018; Favillier et al., 2017; Peitzsch et al., 2021b). A full description of this method can be found in Section 2.4 in Peitzsch et al. (2021b).  $N = 76$  avalanche years identified within 24 individual avalanche paths. b) shows the number of tree-ring samples (sample depth,  $n$ ) collected in each avalanche path through time (years). Refer to Table 1 for abbreviations of avalanche path names.**

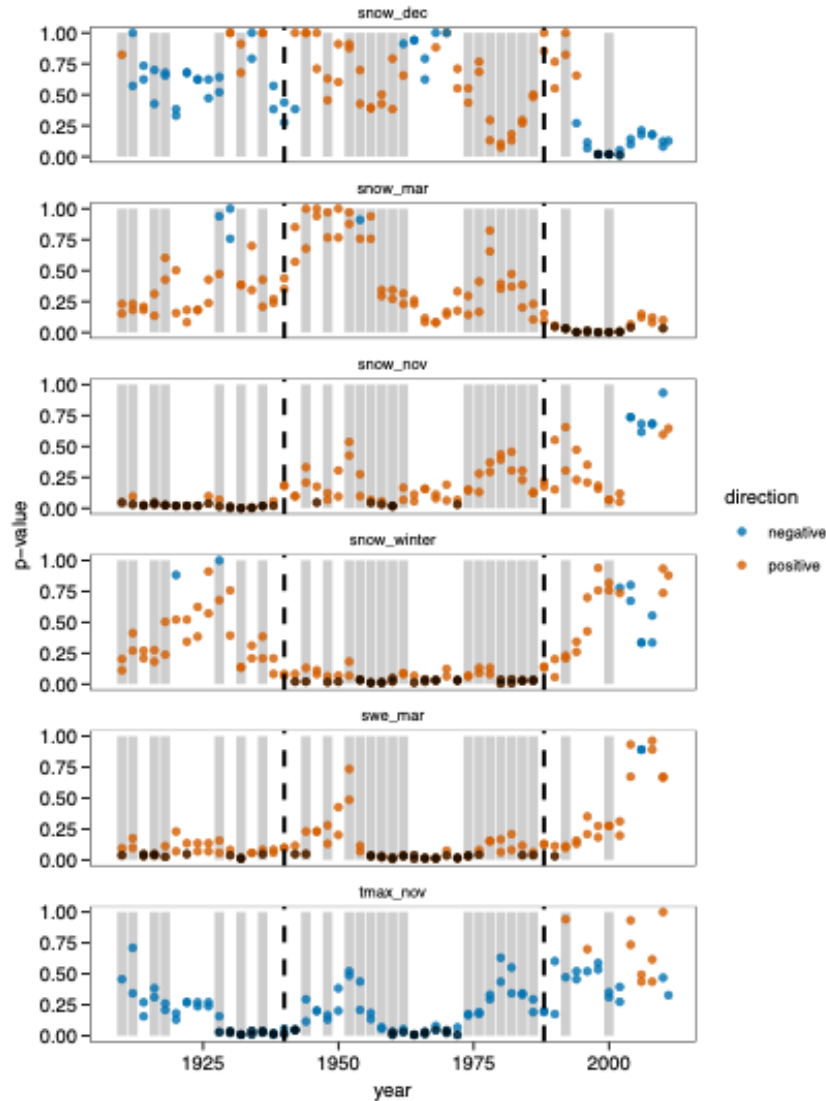

Figure S4: Moving window (20-year) analysis showing the sign and significance in relationship between avalanche years and different seasonal climate conditions (variable listed at top of each panel) from 1901-2019. Points show p-values from a Wilcoxon's Rank Sum Test with  $n=20$  and are plotted on the center year of each window. Black points indicate p-values showing significant differences ( $\alpha=0.05$ ) in climate conditions between avalanche and non-avalanche years given. Vertical dashed lines denote breaks between early, mid, and late periods as previously defined while grey bars show years with RLMA activity. Note that the time series is truncated by 10 years at the beginning and end due to the points being plotted at the middle of the moving window.

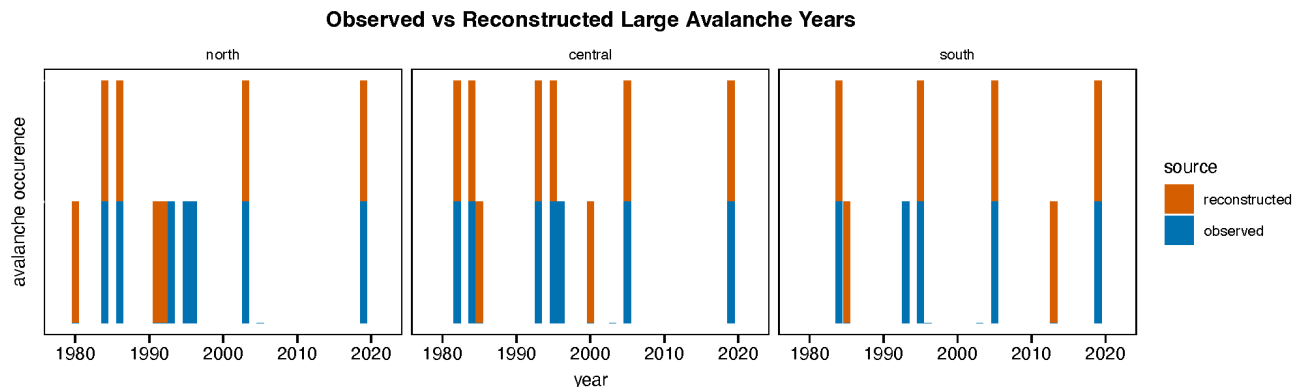

**Figure S5: Comparison of avalanche years in the CIAC observed record and the tree-ring reconstructed avalanche history over 1980 to 2019. The three boxes represent avalanche paths in three sub-regions within Colorado: north, central, and south. The orange (reconstructed large magnitude avalanche year) and blue (historically observed large magnitude avalanche year) bars represent the presence of an avalanche year from each dataset (source). The presence of two bars for a given year indicates avalanche year identified in both datasets.**

(a)

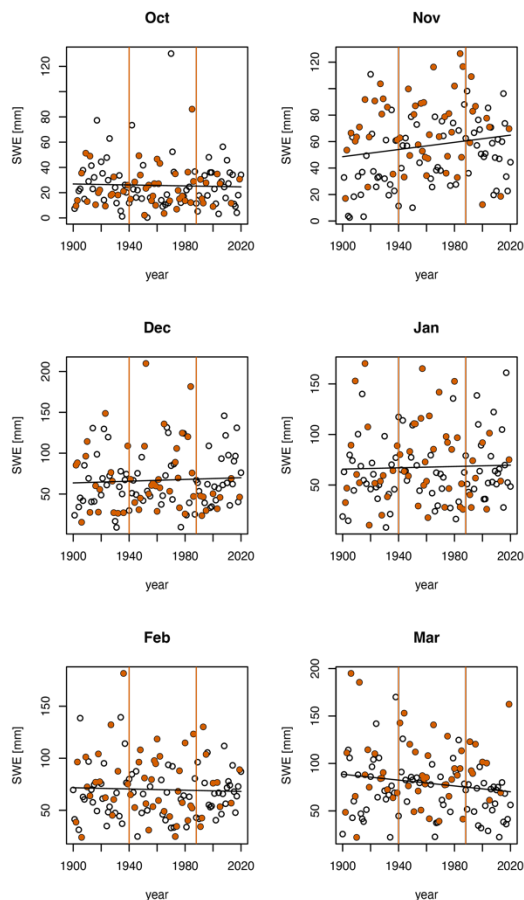

(b)

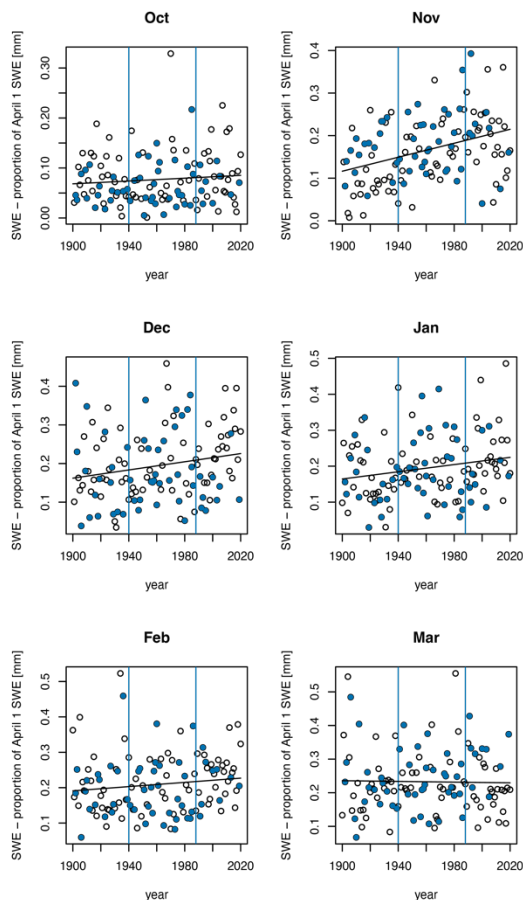

**Figure S6: Changing contributions of monthly snowfall to winter totals depicted by a) average state-wide monthly SWE in mm of water over the 1901-2020 period and , b) the proportion of total state-wide April 1 SWE made up by each month of winter over the 1901-2020 period.**

## Tables

**Table S1: Characteristics of sampled avalanche paths. Topographic variables derived from 5m digital elevation model (DEM).**

| County   | Avalanche Path Name                    | Tree-ring samples (n) | Mean Elevation (m) | Maximum Elevation (m) | Elevation Range (m) | Mean Slope (°) | Mean Aspect (°) | Area (km <sup>2</sup> ) | Path Length (m) |
|----------|----------------------------------------|-----------------------|--------------------|-----------------------|---------------------|----------------|-----------------|-------------------------|-----------------|
| Chaffee  | Sheep Mountain 1 (SHE)                 | 54                    | 2830               | 3595                  | 765                 | 29             | 172             | 0.3                     | 1617            |
| Chaffee  | Sheep Mountain 2 (SHZ)                 | 11                    | 2844               | 3493                  | 649                 | 30             | 142             | 0.2                     | 1180            |
| Hinsdale | Opposite Edith (OEM)                   | 65                    | 3396               | 3878                  | 483                 | 30             | 281             | 0.3                     | 1006            |
| Hinsdale | Rose Cabin Path 3 (RCC)                | 51                    | 3156               | 4106                  | 949                 | 32             | 204             | 1.7                     | 2496            |
| Hinsdale | Rose Cabin Path 12 (RCL)               | 48                    | 3253               | 3859                  | 606                 | 36             | 80              | 0.2                     | 932             |
| Lake     | Everett B (EVB)                        | 51                    | 3116               | 4132                  | 1016                | 29             | 193             | 1.2                     | 2408            |
| Lake     | Monitor Gulch (MTR)                    | 50                    | 2974               | 3960                  | 986                 | 27             | 159             | 1.5                     | 2829            |
| Lake     | Star Mountain A (STA)                  | 68                    | 3097               | 3701                  | 603                 | 23             | 87              | 0.5                     | 1464            |
| Pitkin   | Fingers (FIN)                          | 40                    | 2648               | 3781                  | 1134                | 32             | 127             | 1.8                     | 2653            |
| Pitkin   | Green Mt West (GRN)                    | 65                    | 3083               | 3812                  | 729                 | 27             | 165             | 0.7                     | 1600            |
| Pitkin   | Independence Mt A (Indy Far East, IFE) | 50                    | 3285               | 3846                  | 561                 | 24             | 134             | 1.1                     | 1540            |
| Pitkin   | Maroon Lake (MRL)                      | 20                    | 2864               | 3480                  | 615                 | 28             | 260             | 0.3                     | 1149            |
| Pitkin   | Sievers 1 (SVS)                        | 42                    | 2781               | 3850                  | 1069                | 30             | 139             | 0.7                     | 2358            |
| San Juan | Crown Group (CRG)                      | 48                    | 2989               | 3977                  | 988                 | 36             | 247             | 0.8                     | 1923            |
| San Juan | Eureka 1 (EUR)                         | 50                    | 3015               | 3919                  | 904                 | 36             | 137             | 0.7                     | 1574            |
| Summit   | Big Lee (BGL)                          | 21                    | 2830               | 3847                  | 1017                | 38             | 240             | 0.4                     | 1775            |
| Summit   | Big Tim (BTI)                          | 13                    | 2854               | 3889                  | 1034                | 34             | 261             | 0.5                     | 1728            |
| Summit   | Copper 2 East (COE)                    | 64                    | 3245               | 3895                  | 650                 | 23             | 179             | 0.3                     | 1523            |
| Summit   | Copper 1 West (COW)                    | 40                    | 3214               | 3786                  | 572                 | 26             | 181             | 0.3                     | 1255            |
| Summit   | Ellie (ELL)                            | 42                    | 2930               | 3913                  | 982                 | 38             | 238             | 0.6                     | 1630            |
| Summit   | Monroe (MON)                           | 14                    | 2943               | 3744                  | 801                 | 40             | 270             | 0.3                     | 1167            |
| Summit   | Poop Chute (POO)                       | 48                    | 2950               | 3862                  | 911                 | 29             | 247             | 0.5                     | 2122            |
| Summit   | K Chute (SKK)                          | 18                    | 2976               | 3789                  | 813                 | 28             | 252             | 0.8                     | 2096            |
| Summit   | Y Chute (SKY)                          | 50                    | 2990               | 3837                  | 847                 | 26             | 250             | 0.9                     | 2331            |
